# Supplementary material for: Unexpected effects of different genetic backgrounds on identification of genomic rearrangements via whole-genome next generation sequencing
Source: PubMed Central journal article supplement (PMC5075209; doi:10.1186/s12864-016-3153-9), 2016-10-21

## Numbers of Candidate SV Calls Before Filtering Process

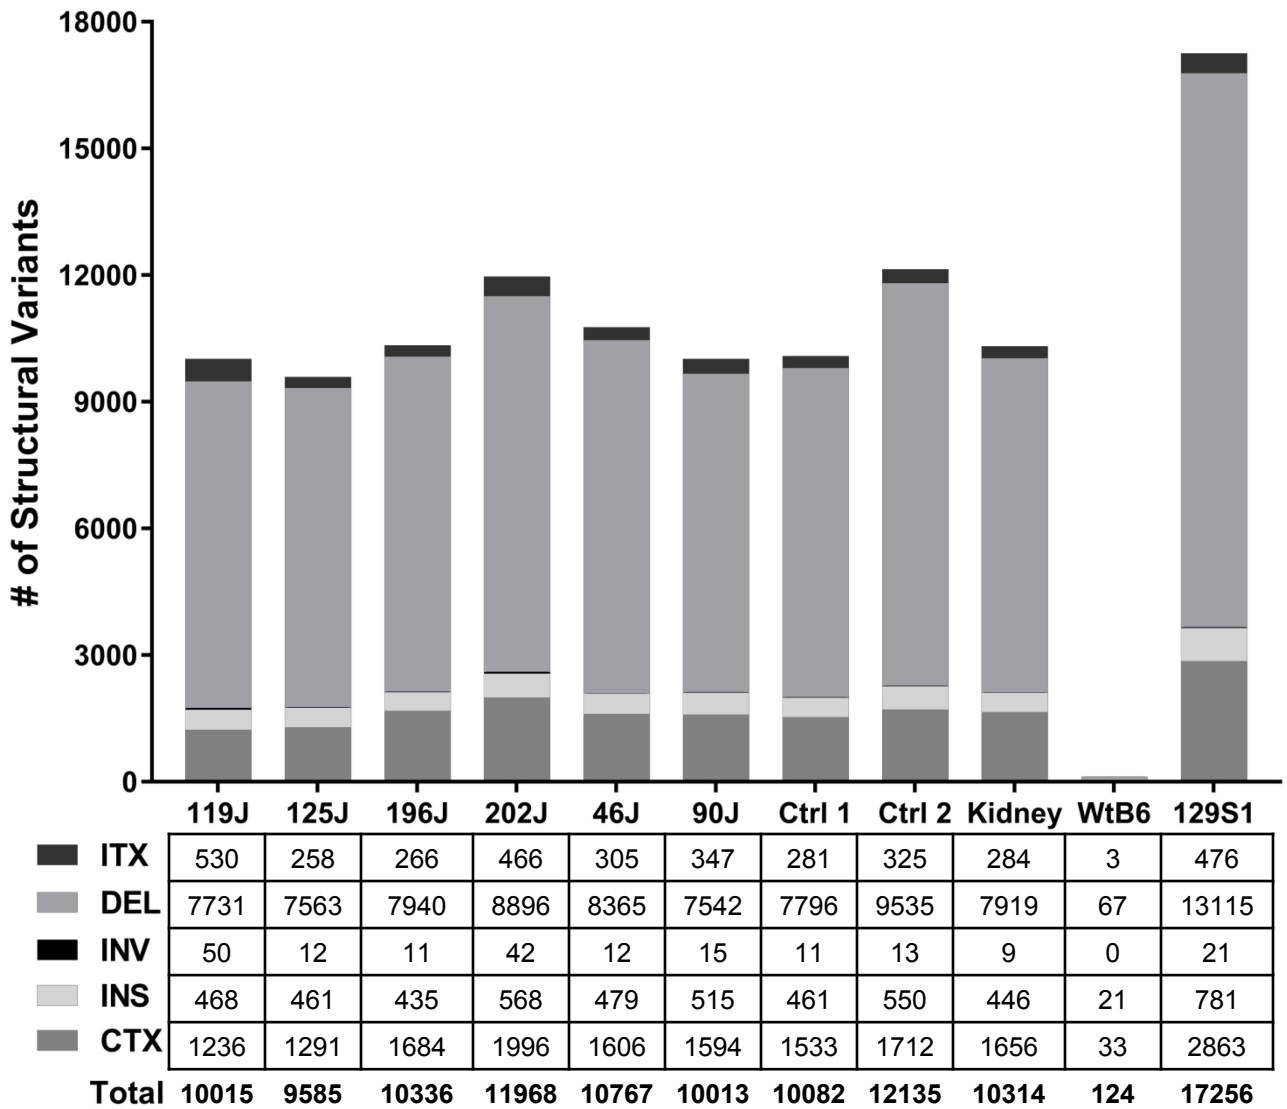

Supplement: 12864_2016_3153_MOESM2_ESM.pdf [file 12864_2016_3153_MOESM2_ESM.pdf]
